# Supplementary material for: Fabrication of NiMn2O4/C hollow spheres with a trilaminar shell structure as an anode material for sodium-ion batteries
Source: Royal Society of Chemistry journal article supplement (doi:10.1039/d3cc05218d), 2023-01-01
Supplement: d3cc05218d1.pdf [file d3cc05218d1.pdf]

## **Supplementary Information**

### **Fabrication of NiMn<sub>2</sub>O<sub>4</sub>/C hollow spheres with trilaminar shell structure as anode material for sodium-ion batteries**

Tao Liu,<sup>a</sup> Xuejie Wang,<sup>a</sup> Yang Han,<sup>a</sup> Yingqi Wu,<sup>a</sup> Liuyang Zhang<sup>\*a</sup> and Jianguo Yu<sup>\*a</sup>

a. Laboratory of Solar Fuel, Faculty of Materials Science and Chemistry, China University of Geosciences, 68 Jincheng Street, Wuhan 430078, P. R. China

## **Experimental section**

### Synthesis of CHSs

70 mL of absolute ethanol was mixed with 10 mL of H<sub>2</sub>O and 3 mL of ammonium hydroxide. The mixture was stirred for 15 min to form a homogeneous solution. Then, 3.46 mL of tetraethyl orthosilicate (TEOS) was dropwise added and stirred for another 20 min. 0.44 g of resorcinol and 0.5 mL of formaldehyde were added into the above solution and continuously stirred for 24 h. After washing with H<sub>2</sub>O and ethanol, SiO<sub>2</sub>@PF was obtained. SiO<sub>2</sub>@PF was annealed at 800 °C for 2 h under N<sub>2</sub> atmosphere to prepare the SiO<sub>2</sub>@C. Finally, CHSs were harvested by the etching of SiO<sub>2</sub>@C with hydrofluoric acid.

### Fabrication of NiMn<sub>2</sub>O<sub>4</sub>@CHS

20 mg of CHSs was added into 80 mL of H<sub>2</sub>O and treated with ultrasonic for 10 minutes to form a uniform dispersion. Then, 1.5 mmol KMnO<sub>4</sub> and 0.75 mmol of Ni(NO<sub>3</sub>)<sub>2</sub>·6H<sub>2</sub>O were added to the mixture and continuously stirred for 5 min. The solution was transferred into a Teflon autoclave and maintained at 120 °C for 10 h in the oven. NiMn-LDH/CHS was obtained after washing with distilled water and anhydrous ethanol. Finally, NiMn-LDH/CHS was converted into NiMn<sub>2</sub>O<sub>4</sub>@CHS after calcination at 350 °C for 2 h under N<sub>2</sub> atmosphere. For comparison, pure NiMn<sub>2</sub>O<sub>4</sub>

without carbon spheres was prepared under the same hydrothermal conditions.

### **Material characterization**

X-ray diffraction (XRD) patterns were collected on the Shimadzu XRD 6100 diffractometer (Cu K $\alpha$ ,  $\lambda = 0.15418$  nm). The microstructure morphology was observed by field emission scanning electron microscope (FESEM, JSM-7500) and transmission electron microscopy (TEM, Titan G2). X-ray photoelectron spectroscopy (XPS) was collected on Thermo ESCALA 250. The Brunauer-Emmett-Teller (BET) specific surface area ( $S_{\text{BET}}$ ) and the pore size distribution via the Barret-Joyner-Halender (BJH) method. were determined on the micromeritics nitrogen adsorption apparatus (ASAP 2020).

### **Electrochemical characterization**

The preparation procedure of the working electrode is as follows: first, NiMn $_2$ O $_4$ @CHS, carbon black, and PVDF (polyvinylidene fluoride) (the weight ratio of 7:2:1) were mixed to form a uniform slurry. Then, the paste was coated on the copper foil and dried in a vacuum at 80 °C for 12h. Finally, the copper foil was cut into a disc with a diameter of 10 mm as the working electrode. The mass loading of active material was about 1.2 mg cm $^{-2}$ . In half cell, sodium metal foil is used as counter and reference electrode. Glass fiber membrane (Whatman) and 1M NaClO $_4$  were used as separator and electrolyte, respectively. The coin cells were assembled in a glove box containing high-purity argon (H $_2$ O and O $_2$  < 0.5 ppm). All the electrochemical tests of the samples were carried out in the battery test system (Neware) and electrochemical workstation (CHI 760E).

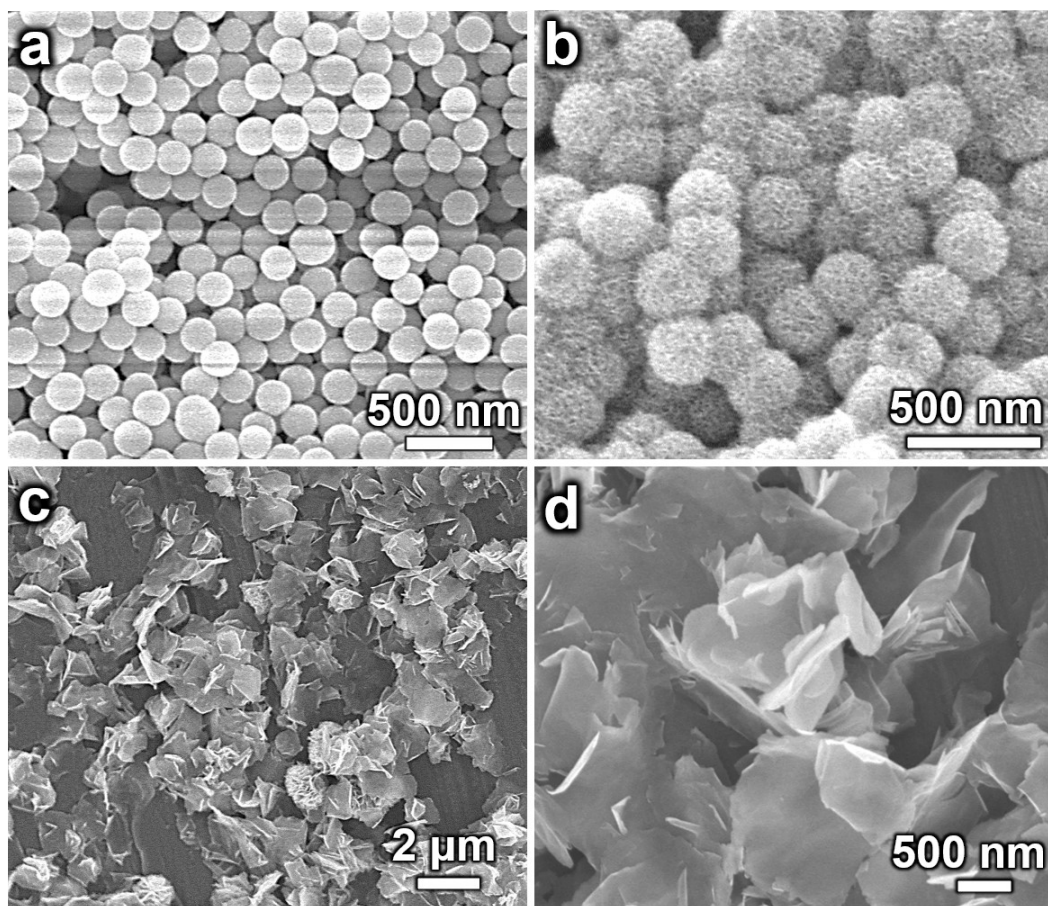

**Figure S1.** FESEM images of (a) CHS, (b) NiMn<sub>2</sub>O<sub>4</sub>/CHS, and (c, d) pure NiMn<sub>2</sub>O<sub>4</sub>.

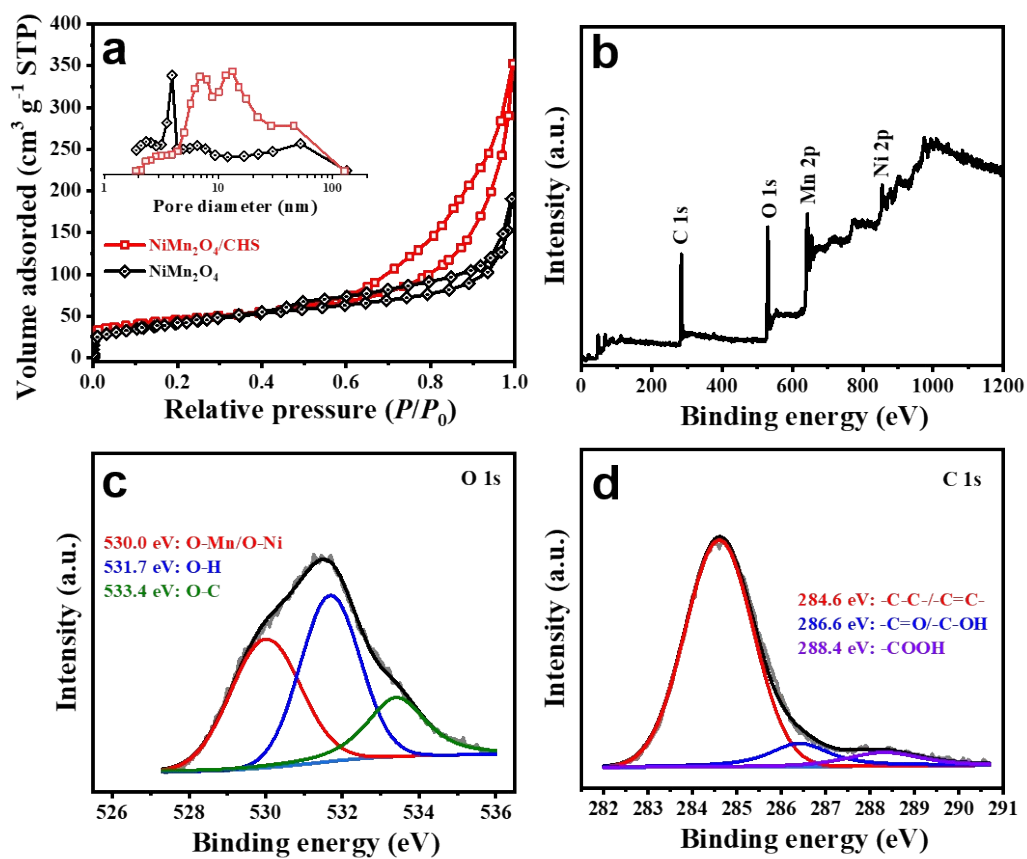

**Figure S2.** (a) N<sub>2</sub> adsorption/desorption isotherms of NiMn<sub>2</sub>O<sub>4</sub> and NiMn<sub>2</sub>O<sub>4</sub>/CHS together with their corresponding pore size distribution. (b) XPS survey spectrum of NiMn<sub>2</sub>O<sub>4</sub>/CHS. High-resolution XPS spectra of (c) O 1s and (d) C 1s.

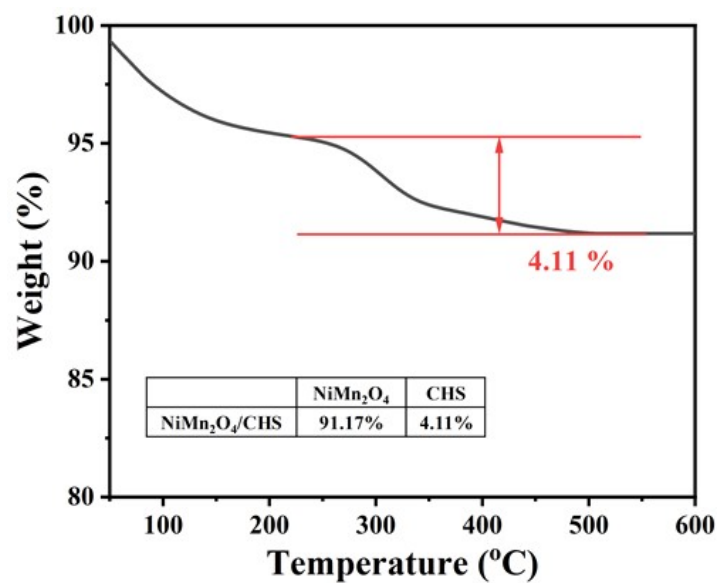

Figure S3. Thermogravimetric analysis of NiMn<sub>2</sub>O<sub>4</sub>/CHS composite.

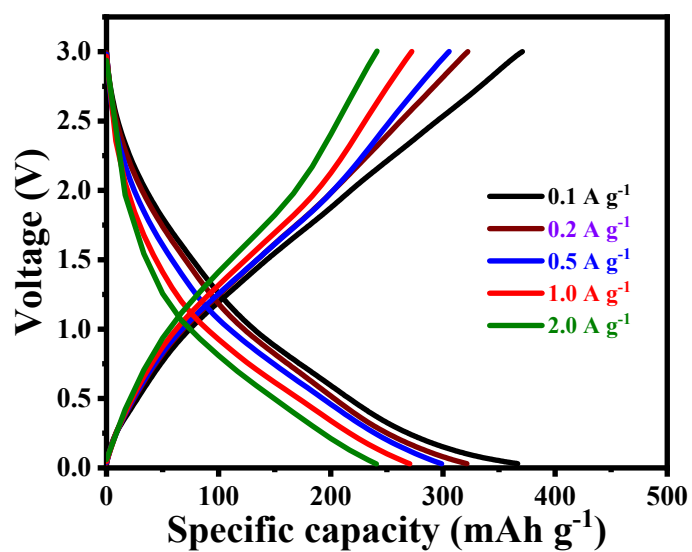

Figure S4. Voltage profiles of NiMn<sub>2</sub>O<sub>4</sub>/CHS at various current densities.

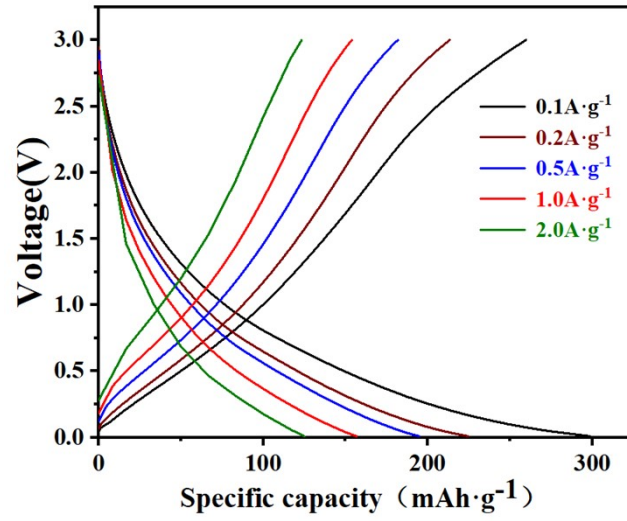

**Figure S5.** The constant current charge/discharge curves of CHS at different current densities.

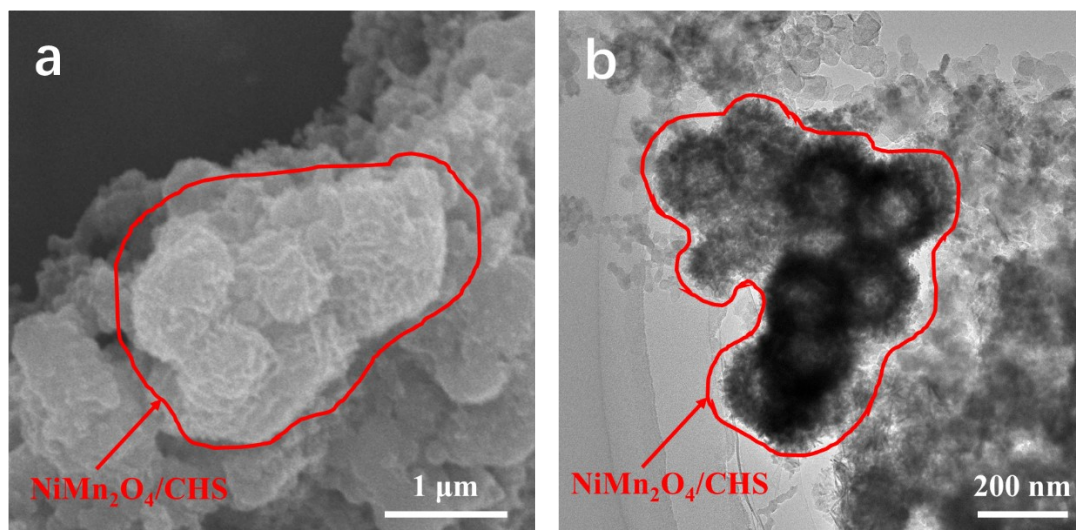

**Figure S6.** The (a) SEM and (b) TEM image of NiMn<sub>2</sub>O<sub>4</sub>/CHS after cycling test.
